# Supplementary material
Source: Springer Nature journal article supplement (https://www.springermedizin.de/resource/supplementary/12876_2011_777_MOESM7_ESM.pdf/9437764)

**A****1 day CCl<sub>4</sub>**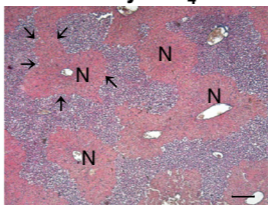**B****5 days****8 days**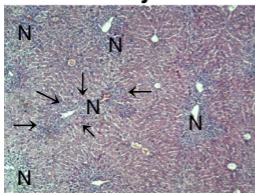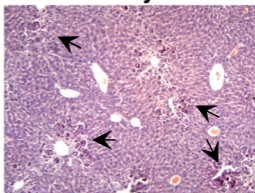**CCl<sub>4</sub>**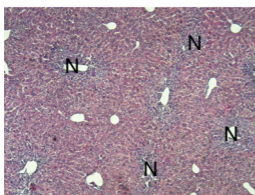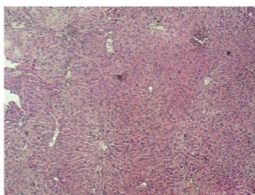**CCl<sub>4</sub>+MSCs****C**

■ CCl<sub>4</sub> □ CCl<sub>4</sub>+MSC

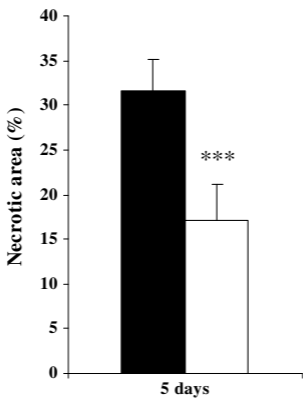

Supplement: MOESM7 [file 9437764]
